# Supplementary material for: Tumor burden monitoring using cell-free tumor DNA could be limited by tumor heterogeneity in advanced breast cancer and should be evaluated together with radiographic imaging
Source: BMC Cancer. 2017 Mar 22;17:210. doi: 10.1186/s12885-017-3185-9 (PMC5362993; doi:10.1186/s12885-017-3185-9)
Supplement: Supplementary file 2 — Limit of detection and limit of quantification estimation according to ICH guidelines. (XLSX 30 kb) [file 12885_2017_3185_MOESM2_ESM.xlsx]

## Sheet: LOD_LOQ H1047R 
sample ID	Teorical Target/total (Y)	Target/Total (X)	CI Target/Total	Copies/microliter (VIC)	CI Copies/microliter (VIC)	Copies/microliter (FAM)	CI Copies/microliter (FAM)	Chips
H0.05%	0.0005	0.000243	4.18E-3% -- 0.138%	327.76	322.47 -- 333.14	0.0798	2.99E-2 -- 0.212	4
H0.1%	0.001	0.000541	1.46E-2% -- 0.197%	293.57	288.61 -- 298.62	0.159	7.95E-2 -- 0.318	4
H0.5%	0.005	0.00333	0.197% -- 0.563%	327.84	322.56 -- 333.21	1.122	0.863 -- 1.458	4
H1%	0.01	0.00719	0.497% -- 1.04%	314.58	309.39 -- 319.86	2.432	2.03 -- 2.912	4
H0%	0	0	NA	163	157.93 -- 168.24	0	NA	2
C679	0	0.000181	3.10E-3% -- 0.102%	429.79	417.66 -- 442.28	0.0776	1.09E-2 -- 0.551	2
C1002	0	0	NA	246.84	240.33 -- 253.53	0	NA	2
C1005	0	0.000199	3.42E-3% -- 0.113%	373.18	362.26 -- 384.44	0.0743	1.05E-2 -- 0.527	2
SUMMARY OUTPUT
Regression Statistics
Multiple R	0.999557
R Square	0.999114
Adjusted R Square	0.998671
Standard Error	0.000160563
Observations	4
	Coefficients	Standard Error
Intercept	0.000266882	0.000114219
X Variable 1	1.36522	0.0287492
		Based on standard error of the y-intercept		Based on blank measurements
	LOQ	0.00083663			0.00119442
	LOD	0.000276088			0.000424827
	LOB	0.000275855

## Sheet: LOD_LOQ E542K 
sample ID	Teorical Target/total (Y)	Target/Total (X)	CI Target/Total	Copies/microliter (VIC)	CI Copies/microliter (VIC)	Copies/microliter (FAM)	CI Copies/microliter (FAM)	Chips
T1%	0.01	0.00835	0.585% -- 1.189%	290.35	285.45 -- 295.33	2.447	2.053 -- 2.916	4
T0.1%	0.001	0.00117	4.73E-2% -- 0.287%	307.34	302.22 -- 312.55	0.365	0.23 -- 0.58	4
T0.5%	0.005	0.0045	0.281% -- 0.72%	304.39	299.33 -- 309.53	1.393	1.102 -- 1.761	4
T0.05%	0.0005	0.00053	1.43E-2% -- 0.193%	285.16	280.4 -- 290.01	0.151	7.56E-2 -- 0.302	4
CF2 1/16 E542K 1	0	0	NA	154.59	149.77 -- 159.56	0	NA	2
CF2 1/16 E542K 2	0	0	NA	160.77	155.75 -- 165.95	0	NA	2
C1002	0	0	NA	284.13	277.41 -- 291	0	NA	2
C1005	0	0.000236	5.47E-3% -- 0.104%	470.51	461.49 -- 479.7	0.12	3.88E-2 -- 0.373	2
SUMMARY OUTPUT
Regression Statistics
Multiple R	0.999253
R Square	0.998507
Adjusted R Square	0.99776
Standard Error	0.000208424
Observations	4
	Coefficients	Standard Error
Intercept	-0.000332143	0.000160355
X Variable 1	1.22533	0.0335051
		Based on standard error of the y-intercept		Based on Standard Deviation of the Blank
	LOQ	0.00130866			0.001239
	LOD	0.000431859			0.000413
	LOB	0.00025311

## Sheet: LOD-LOQ E545K
sample ID	Teorical Target/total (Y)	Target/Total	CI Target/Total	Copies/microliter (VIC)	CI Copies/microliter (VIC)	Copies/microliter (FAM)	CI Copies/microliter (FAM)	Chips
5K0.05%	0.0005	0.000303	6.25E-3% -- 0.15%	317.16	311.98 -- 322.42	0.104	4.33E-2 -- 0.25	4
5K0.1%	0.001	0.000988	3.81E-2% -- 0.257%	310.95	305.83 -- 316.16	0.326	0.2 -- 0.533	4
5K0.5%	0.005	0.00328	0.192% -- 0.559%	324.5	319.22 -- 329.87	1.102	0.844 -- 1.439	4
5K1%	0.01	0.00628	0.421% -- 0.933%	314.66	309.44 -- 319.96	2.088	1.716 -- 2.54	4
CF2 1/16 E545K2	0	0	NA	154.71	149.72 -- 159.86	0	NA	2
CF2 1/16 E545K1	0	0	NA	154.83	150.02 -- 159.8	0	NA	2
545-C1002-R1	0	0.000116	1.97E-3% -- 6.56E-2%	669.3	658.01 -- 680.77	0.0774	1.93E-2 -- 0.309	2
545-C1005-R2	0	0	NA	421.66	413.31 -- 430.19	0	NA	2
545-C1006-R2	0	0	NA	714.22	702.56 -- 726.08	NA	NA	2
SUMMARY OUTPUT
Regression Statistics
Multiple R	0.998312
R Square	0.996628
Adjusted R Square	0.994941
Standard Error	0.000313235
Observations	4
	Coefficients	Standard Error
Intercept	-0.000296576	0.000240014
X Variable 1	1.62992	0.0670435
		Based on standart error of the y-intercept		Based on Standard Deviation of the Blank
	LOQ	0.00147255			0.000547434
	LOD	0.00048594			0.00018789
	LOB	0.000118293
